# Supplementary material for: The Threshold of Visceral Adipose Tissue Areas Measured With QCT On Cardiometabolic Risk Factors In A Nationwide Study In China
Source: Research Square preprint supplement (doi:10.21203/rs.3.rs-1130497/v1), 2021-12-08
Supplement: Supplementary file 1 [file 12f45c9fbab0391f4b0fe249.docx]

**Supplement Table 1**. Threshold points of visceral adipose tissue area for the identification of metabolic syndrome across different regions of China

|  | Threshold, cm2 | Sensitivity, % | Specificity, % | PPV, % | NPV, % | Diagnostic accuracy, % |
| --- | --- | --- | --- | --- | --- | --- |
| **Men** |  |  |  |  |  |  |
| North | 196 | 82.1 | 84.2 | 88.5 | 76.2 | 83.0 |
| East | 212 | 79.7 | 70.3 | 37.9 | 93.9 | 72.1 |
| Center | 218 | 79.3 | 62.8 | 50.5 | 86.4 | 68.1 |
| Southwest | 194 | 78.6 | 62.3 | 45.9 | 87.7 | 67.0 |
| **Women** |  |  |  |  |  |  |
| North | 179 | 1 | 0.89 | 66.7 | 1 | 90.9 |
| East | 158 | 82.9 | 83.9 | 26.9 | 98.6 | 83.8 |
| Center | 149 | 80.7 | 75.9 | 29.5 | 96.9 | 76.4 |
| Southwest | 113 | 91.2 | 61.5 | 22.8 | 98.2 | 64.8 |

PPV, positive predictive value; NPV, negative predictive value.
